# Supplementary material for: Genome-Wide Expression in Visceral Adipose Tissue from Obese Prepubertal Children
Source: Int J Mol Sci. 2015 Apr 8;16(4):7723–37. doi: 10.3390/ijms16047723 (PMC4425045; doi:10.3390/ijms16047723)
Supplement: Supplementary file 1 [file ijms-16-07723-s001.zip]

Archive with 6 entries (5 files):
- ijms-79084-Supplementary Information/
- ijms-79084-Supplementary Information/Figure S1.pdf
- ijms-79084-Supplementary Information/Table S1.xls
- ijms-79084-Supplementary Information/Table S2.xls
- ijms-79084-Supplementary Information/Table S3.xls
- ijms-79084-Supplementary Information/Table S4.xls
