# Supplementary material for: Genome-Wide Expression in Visceral Adipose Tissue from Obese Prepubertal Children
Source: Int J Mol Sci. 2015 Apr 8;16(4):7723–37. doi: 10.3390/ijms16047723 (PMC4425045; doi:10.3390/ijms16047723)
Supplement: Supplementary file 1 [file ijms-16-07723-s001.zip › ijms-79084-Supplementary Information/Table S1.xls]

## Sheet: Hoja1
Table S1. Gene with up-regulated expression in adipose tissue of prepubertal obese children.
Gene Symbol	Fold Change	p-value	Gene Title	Probe Set ID	Chromosomal Location
Metabolism
ABHD5	2.34095	0.030875	abhydrolase domain containing 5	213935_at	3p21
AKR1C1	2.89373	0.0048201	aldo-keto reductase family 1, member C1	204151_x_at	10p15–p14
AKR1C2	3.18836	0.0061673	aldo-keto reductase family 1, member C2	209699_x_at	10p15–p14
AKR1C3	2.60055	0.0318371	aldo-keto reductase family 1, member C3	209160_at	10p15–p14
ALDH3A2	2.2347	0.0436247	aldehyde dehydrogenase 3 family, member A2	202054_s_at	17p11.2
ALDH4A1	4.38995	0.00465531	aldehyde dehydrogenase 4 family, member A1	203722_at	1p36
BHMT2	3.14248	0.00490488	βine-homocysteine methyltransferase 2	219902_at	5q13
CES1	11.7412	0.0009	carboxylesterase 1	209616_s_at	16q22.2
CRYAB	2.24988	0.00510006	crystallin, α B	209283_at	11q22.3–q23.1
FBXL17	1.99943	0.0394083	F-box and leucine-rich repeat protein 17	227203_at	5q21.3
FRY	2.07436	0.00845189	furry homolog (Drosophila)	204072_s_at	13q13.1
GALNT15	2.47577	0.0486527	UDP-N-acetyl-α-D-galactosamine:polypeptide N-acetylgalactosaminyltransferase-like 2	228501_at	3p25.1
GPX4	2.27806	0.029031	glutathione peroxidase 4 (phospholipid hydroperoxidase)	201106_at	19p13.3
GSN	2.0748	0.0382223	gelsolin (amyloidosis, Finnish type)	200696_s_at	9q33
HP1BP3	2.15207	0.000506	Heterochromatin protein 1, binding protein 3	229204_at	1p36.12
IDO1	5.43964	0.000679	indoleamine-pyrrole 2,3 dioxygenase	210029_at	8p12–p11
ITIH5	4.07762	0.0064137	inter-α (globulin) inhibitor H5	219064_at	10p14
LIPE	2.2804	0.0139424	Lipase, hormone-sensitive	217649_at	19q13.2
LNPEP	2.04217	0.0231918	Leucyl/cystinyl aminopeptidase	225176_at	5q15
LONRF1	2.0747	0.00528451	LON peptidase N-terminal domain and ring finger 1	215322_at	8p23.1
MAN2A2	2.46805	0.0235145	mannosidase, α, class 2A, member 2	219999_at	15q26.1
MAOB	2.41131	0.00311993	monoamine oxidase B	204041_at	Xp11.23
MGLL	2.13464	0.0184982	monoglyceride lipase	225102_at	3q21.3
NMT2	2.35071	0.0176718	N-myristoyltransferase 2	205006_s_at	10p13
NQO1	3.99	0.00628399	NAD(P)H dehydrogenase, quinone 1	201467_s_at	16q22.1
PDK4	3.18	8.43011e-05	pyruvate dehydrogenase kinase, isozyme 4	225207_at	7q21.3
RNF125	2.23102	0.0265247	ring finger protein 125	235199_at	18q12.1
TKT	2.11922	0.000579	transketolase (Wernicke-Korsakoff syndrome)	208700_s_at	3p14.3
USP53	2.48827	0.000865	Ubiquitin specific peptidase 53	237465_at	4q26
WNK1	2.27152	0.0276536	WNK lysine deficient protein kinase 1	211993_at	12p13.3
PARM1	2.15694	0.0476821	prostate androgen-regulated mucin-like protein 1	225809_at	4q13.3–q21.3
Cell Signaling
ADRA2A	2.0222	0.0417428	adrenergic, α-2A-, receptor	209869_at	10q25.2
ADRB2	3.03994	0.00329248	adrenergic, β-2-, receptor, surface	206170_at	5q31–q32
AKAP12	2.3897	0.00429416	A kinase (PRKA) anchor protein (gravin) 12	227530_at	6q24–q25
ANKRD12	2.89849	0.00497071	Ankyrin repeat domain 12	216563_at	18p11.22
ANTXR2	2.08968	0.00554096	anthrax toxin receptor 2	225524_at	4q21.21
ARHGEF6	2.04156	0.0340657	Rac/Cdc42 guanine nucleotide exchange factor (GEF) 6	209539_at	Xq26.3
C20orf160	2.15668	0.0215176	chromosome 20 open reading frame 160	231991_at	20q11.2
COCH	2.02032	0.0108409	coagulation factor C homolog, cochlin (Limulus polyphemus)	1554241_at	14q11.2–q13
CRIM1	2.1035	0.0113899	cysteine rich transmembrane BMP regulator 1 (chordin-like)	202552_s_at	2p21
CTSF	2.26096	0.0442404	cathepsin F	203657_s_at	11q13
SGK223	2.10461	0.00522515	homolog of rat pragma of Rnd2	235085_at	8p23.1
EHD2	2.04015	0.0215061	EH-domain containing 2	221870_at	19q13.3
ELTD1	2.02186	0.0454301	EGF, latrophilin and seven transmembrane domain containing 1	219134_at	1p33–p32
FAM107A	2.0058	0.0121105	family with sequence similarity 107, member A	209074_s_at	3p21.1
FAM13A1	2.85416	0.0301061	family with sequence similarity 13, member A1	202973_x_at	4q22.1
GABARAPL1	2.88034	0.0201851	GABA(A) receptor-associated protein like 1	211458_s_at	12p13.2
GBP4	2.98437	0.0240406	guanylate binding protein 4	235175_at	1p22.2
GKAP1	2.78208	0.0358801	G kinase anchoring protein 1	229312_s_at	9q21.32
GNAI1	2.17051	0.0146167	guanine nucleotide binding protein (G protein), α inhibiting activity polypeptide 1	209576_at	7q21
GNG11	2.5789	0.0105522	guanine nucleotide binding protein (G protein), gamma 11	204115_at	7q21
GPR56	2.0661	0.0177507	G protein-coupled receptor 56	212070_at	16q13
IRS2	2.38036	0.0355351	insulin receptor substrate 2	209184_s_at	13q34
ITSN1	2.01235	0.0457948	intersectin 1 (SH3 domain protein)	209297_at	21q22.1–q22.2
LEP	4.44325	0.00547997	leptin (obesity homolog, mouse)	207092_at	7q31.3
MAML2	2.14868	0.0236275	mastermind-like 2 (Drosophila)	235457_at	11q21
MCF2L	2.48434	0.0173094	MCF.2 cell line derived transforming sequence-like	212935_at	13q34
MGC17330	2.69791	0.0253416	HGFL gene	221756_at	22q12.2
NPR3	4.3125	0.00511664	natriuretic peptide receptor C	219789_at	5p14–p13
NUCKS1	2.62485	0.00144661	Nuclear casein kinase and cyclin-dependent kinase substrate 1	222027_at	1q32.1
OR51E1	2.95731	0.0453038	olfactory receptor, family 51, subfamily E, member 1	229768_at	11p15.4
P2RY14	2.1887	0.0366476	purinergic receptor P2Y, G-protein coupled, 14	206637_at	3q21–q25.1
PLAC9	2.62467	0.00577498	placenta-specific 9	227419_x_at	10q22.3
PPM1A	2.36902	0.00767286	protein phosphatase 1A (formerly 2C), magnesium-dependent, α isoform	210407_at	14q23.1
PPP1R14A	4.57706	0.00052	protein phosphatase 1, regulatory (inhibitor) subunit 14A	227006_at	19q13.1
PTPRS	2.11155	0.0301817	protein tyrosine phosphatase, receptor type, S	226571_s_at	19p13.3
RABGAP1L	2.28184	0.0156791	RAB GTPase activating protein 1-like	213982_s_at	1q24
SFRP1	2.87	0.0113634	secreted frizzled-related protein 1	202037_s_at	8p11.21
SH3D19	2.06141	0.038686	SH3 domain protein D19	225162_at	4q31.3
SPARC	2.12485	0.0376715	secreted protein, acidic, cysteine-rich (osteonectin)	212667_at	5q31.3–q32
STC1	2.02907	0.0271946	stanniocalcin 1	204595_s_at	8p21–p11.2
SYN2	2.75795	0.0306106	synapsin II	210247_at	3p25
TMEM140	2.97909	0.00066	transmembrane protein 140	218999_at	7q33
PMEPA1	2.42082	0.00704545	prostate transmembrane protein, androgen induced 1	222450_at	20q13.31–q13.33
TNS1	2.66536	0.0111325	Tensin 1	232750_at	2q35–q36
VRK3	2.06509	0.0145737	vaccinia related kinase 3	218022_at	19q13
Cell Adhesion, Extracellular Matrix and Cytoskeleton Proteins
ABLIM1	2.47922	0.00223399	actin binding LIM protein 1	210461_s_at	10q25
CEP350	2.34812	0.0225779	centrosomal protein 350kDa	213956_at	1q25.2
CD151	2.07306	0.000476	CD151 molecule (Raph blood group)	204306_s_at	11p15.5
CLDN5	2.52754	0.0316433	claudin 5 (transmembrane protein deleted in velocardiofacial syndrome)	204482_at	22q11.21
CRTAP	2.26733	0.02954	cartilage associated protein	226656_at	3p22.3
DDR2	2.07065	0.00725175	Discoidin domain receptor family, member 2	225442_at	1q23.3
DPT	4.07003	0.0168995	dermatopontin	213071_at	1q12–q23
DTNA	2.02949	0.0129817	dystrobrevin, α	227084_at	18q12
ECM2	3.70079	0.016524	extracellular matrix protein 2, female organ and adipocyte specific	206101_at	9q22.3
FBLN2	2.21552	0.0102722	fibulin 2	203886_s_at	3p25.1
FGD4	2.14156	0.0434363	FYVE, RhoGEF and PH domain containing 4	227948_at	12p11.21
FGD5	2.15454	0.0483893	FYVE, RhoGEF and PH domain containing 5	226985_at	3p25.1
FGL2	2.20934	0.0360447	fibrinogen-like 2	227265_at	7q11.23
FHL1	2.66349	0.0308927	four and a half LIM domains 1	201540_at	Xq26
GLDN	3.52278	0.0179218	gliomedin	230360_at	15q21.2
ITGB5	2.1245	0.000495	integrin, β 5	201125_s_at	3q21.2
LAMB2	2.00541	0.0232461	laminin, β 2 (laminin S)	216264_s_at	3p21
LMOD1	3.43321	0.0309329	leiomodin 1 (smooth muscle)	203766_s_at	1q32
MAP4	2.39078	0.00434986	microtubule-associated protein 4	33850_at	3p21
MMRN2	2.09868	0.0070298	multimerin 2	236262_at	10q23.2
NEXN	2.20058	0.00694608	nexilin (F actin binding protein)	1552309_a_at	1p31.1
PCOLCE2	2.10551	0.0182635	procollagen C-endopeptidase enhancer 2	219295_s_at	3q21–q24
PRELP	2.00679	0.00993706	proline/arginine-rich end leucine-rich repeat protein	228224_at	1q32
SESTD1	2.30046	0.0138674	SEC14 and spectrin domains 1	226763_at	2q31.2
SPTBN1	2.48075	0.049877	Spectrin, β, non-erythrocytic 1	226765_at	2p21
SSPN	4.78356	0.0152562	sarcospan (Kras oncogene-associated gene)	204963_at	12p11.2
SYNC1	2.30258	0.0483808	syncoilin, intermediate filament 1	221276_s_at	1p35.1
SYNPO2	2.31531	0.00526762	synaptopodin 2	225720_at	4q26
TIMP3	2.94694	0.0266653	TIMP metallopeptidase inhibitor 3 (Sorsby fundus dystrophy, pseudoinflammatory)	240135_x_at	22q12.3
TIMP4	2.39976	0.0283623	TIMP metallopeptidase inhibitor 4	206243_at	3p25
TNMD	7.1934	0.0275777	tenomodulin	220065_at	Xq21.33–q23
VWF	2.59129	0.0225177	von Willebrand factor	202112_at	12p13.3
Cell Proliferation, differentiation and death
AMIGO2	2.16088	0.0347859	adhesion molecule with Ig-like domain 2	222108_at	12q13.11
ANGPTL4	3.19914	0.00733764	angiopoietin-like 4	221009_s_at	19p13.3
ANXA1	2.13963	0.0369306	Annexin A1	233011_at	9q21.3
XAF1	2.22	0.0306037	XIAP associated factor-1	206133_at	17p13.1
CCND1	3.34365	0.0497787	cyclin D1	208712_at	11q13
CDKN1C	2.40635	0.0469373	Cyclin-dependent kinase inhibitor 1C (p57, Kip2)	213183_s_at	11p15.5
CDKN2B	2.89166	0.0219284	cyclin-dependent kinase inhibitor 2B (p15, inhibits CDK4)	236313_at	9p21
NEDD9	2.13697	0.00634106	neural precursor cell expressed, developmentally down-regulated 9	202149_at	6p25–p24
PHF17	2.02246	0.0426962	PHD finger protein 17	225816_at	4q26–q27
RSAD2	5.35787	0.0401174	radical S-adenosyl methionine domain containing 2	242625_at	2p25.2
CLIP4	2.33643	0.0046709	CAP-GLY domain containing linker protein family, member 4	226425_at	2p23.2
SASH1	2.76114	0.0328534	SAM and SH3 domain containing 1	41644_at	6q24.3
sept8	2.11412	0.0300425	septin 8	226627_at	5q31
SAMD9	2.31009	0.0270989	sterile α motif domain containing 9	228531_at	7q21.2
XRN1	2.16867	0.000899	5'-3' exoribonuclease 1	225814_at	3q23
Transport
ATP6V0E2	2.12312	0.00324171	ATPase, H+ transporting V0 subunit e2	213587_s_at	7q36.1
ATP9A	2.70034	0.0452522	ATPase, Class II, type 9A	212062_at	20q13.2
COPZ2	2.39356	0.00282342	coatomer protein complex, subunit zeta 2	219561_at	17q21.32
COX7A1	2.48586	0.00307213	cytochrome c oxidase subunit VIIa polypeptide 1 (muscle)	204570_at	19q13.1
CYP4B1	12.1237	0.00183565	cytochrome P450, family 4, subfamily B, polypeptide 1	210096_at	1p34–p12
RGPD5	2.47206	0.0341108	RANBP2-like and GRIP domain containing 5	232511_at	2q13
SYTL4	2.74605	0.0347225	Synaptotagmin-like 4 (granuphilin-a)	229991_s_at	---
Inmune Response
B2M	3.06615	0.027235	β-2-microglobulin	232311_at	15q21–q22.2
HLA-E	2.02367	0.0212333	major histocompatibility complex, class I, E	200904_at	6p21.3
MARCH8	2.00585	0.00736271	membrane-associated ring finger (C3HC4) 8	221824_s_at	10q11.21
MMD	2.10231	0.0132093	monocyte to macrophage differentiation-associated	203414_at	17q
MTCP1	2.26576	0.00534033	mature T-cell proliferation 1	210212_x_at	Xq28
TAPBPL	2.21719	0.00663439	TAP binding protein-like	218747_s_at	12p13.31
Transcription Regulation
AFF1	2.20273	0.00425768	AF4/FMR2 family, member 1	201924_at	4q21
ATXN3	2.08074	0.00509805	Ataxin 3	235240_at	14q21
BRAP	2.14059	0.00712461	BRCA1 associated protein	213473_at	12q24
FOXN3	3.82	0.013044	checkpoint suppressor 1	230790_x_at	14q31.3
CITED2	2.18494	0.0467149	Cbp/p300-interacting transactivator, with Glu/Asp-rich carboxy-terminal domain, 2	209357_at	6q23.3
ETS1	2.00089	0.00936397	V-ets erythroblastosis virus E26 oncogene homolog 1 (avian)	241435_at	11q23.3
FMNL2	2.85999	0.0119614	formin-like 2	242665_at	2q23.3
FOXO3A	2.22054	0.00503463	forkhead box O3A	204131_s_at	6q21
FRG1	2.22619	0.0233336	FSHD region gene 1	235535_x_at	4q35
H2AFJ	2.00226	0.0129652	H2A histone family, member J	224301_x_at	12p12.3
MPHOSPH8	2.60964	0.0317024	M-phase phosphoprotein, mpp8	225041_at	13q12.11
JUN	2.53846	0.0187715	Jun oncogene	213281_at	1p32–p31
JUND	2.164	0.0273248	jun D proto-oncogene	203752_s_at	19p13.2
SECISBP2L	2.6822	0.0268766	SECIS binding protein 2-like	212451_at	15q21.1
CTIF	2.01708	0.0148074	CBP80/20-dependent translation initiation factor	204303_s_at	18q21.1
KLF2	2.10283	0.0117826	Kruppel-like factor 2 (lung)	219371_s_at	19p13.11
KLF4	2.87924	0.00707992	Kruppel-like factor 4 (gut)	221841_s_at	9q31
RC3H2	2.18192	0.0347086	ring finger and CCCH-type domains 2	225813_at	9q34
NAV1	2.40279	0.0241949	neuron navigator 1	224771_at	1q32.3
NDRG1	2.2528	0.00167573	N-myc downstream regulated gene 1	200632_s_at	8q24.3
NFATC1	2.01288	0.015611	nuclear factor of activated T-cells, cytoplasmic, calcineurin-dependent 1	211105_s_at	18q23
PTRF	2.10179	0.0431112	polymerase I and transcript release factor	208790_s_at	17q21.2
RB1CC1	2.04991	0.017691	RB1-inducible coiled-coil 1	202034_x_at	8q11
RHOB	2.10616	0.0441554	ras homolog gene family, member B	212099_at	2p24
SAMD4A	2.07073	6.92e-05	sterile α motif domain containing 4A	212845_at	14q22.2
SAP18	2.14785	0.00251068	Sin3A-associated protein, 18kDa	208741_at	13q12.11
SESN1	2.10799	0.00541806	sestrin 1	218346_s_at	6q21
SFRS11	2.35851	0.0483823	splicing factor, arginine/serine-rich 11	200685_at	1p31
SPOP	2.04131	0.00886541	speckle-type POZ protein	208927_at	17q21.33
TBX3	2.27847	0.0363081	T-box 3 (ulnar mammary syndrome)	225544_at	12q24.1
MED13L	2.21481	0.0300873	mediator complex subunit 13-like	212207_at	12q24.21
TMCC1	2.05592	0.00567887	transmembrane and coiled-coil domain family 1	227112_at	3q21.3
TSC22D1	2.71267	0.0317472	TSC22 domain family, member 1	215111_s_at	13q14
TSC22D3	2.32166	0.00626691	TSC22 domain family, member 3	208763_s_at	Xq22.3
YPEL2	3.03027	0.0386707	yippee-like 2 (Drosophila)	229060_at	17q23.2
ZBTB16	4.88901	0.0424384	zinc finger and BTB domain containing 16	205883_at	11q23.1
ZBTB4	2.34154	0.0429098	zinc finger and BTB domain containing 4	225629_s_at	17p13.1
LOC153222	2.31457	0.0299145	Adult retina protein	235556_at	5q35.1
ZFAND5	2.2286	0.00378933	zinc finger, AN1-type domain 5	210275_s_at	9q13–q21
Unknown
BTNL9	2.65711	0.0403206	butyrophilin-like 9	230992_at	5q35.3
C19orf12	2.10155	0.0342648	chromosome 19 open reading frame 12	223983_s_at	19q12
C1orf213	2.42621	0.0465038	chromosome 1 open reading frame 213	229086_at	1p36.12
C21orf25	2.21806	0.0151554	chromosome 21 open reading frame 25	212875_s_at	21q22.3
C4orf32	2.62682	0.021895	chromosome 4 open reading frame 32	240465_at	4q25
C5orf23	3.2794	0.00628231	chromosome 5 open reading frame 23	219054_at	5p13.3
C5orf4	2.36795	0.0169004	chromosome 5 open reading frame 4	48031_r_at	5q31–q32
C6orf145	2.17694	0.00036	chromosome 6 open reading frame 145	212923_s_at	6p25.2
C7orf41	3.1997	0.0332295	chromosome 7 open reading frame 41	227000_at	7p15.1
C9orf58	2.0077	0.0413092	chromosome 9 open reading frame 58	223075_s_at	9q34.13–q34.3
CCDC3	4.66167	0.000283	coiled-coil domain containing 3	223316_at	10p13
FLJ20035	2.3309	0.0333999	hypothetical protein FLJ20035	218986_s_at	4q32.3
FLJ21986	2.42539	0.0245816	hypothetical protein FLJ21986	228728_at	7q31.31
FLJ36848	2.2456	0.0490999	hypothetical LOC647115	231698_at	2p14–p13
FLJ43663	2.10147	0.00211027	Hypothetical protein FLJ43663	238619_at	7q32.3
LOC129607	3.66258	0.0447634	hypothetical protein LOC129607	226702_at	2p25.2
LOC283666	2.12863	0.0121872	hypothetical protein LOC283666	226682_at	15q21.3
LOC284454	2.69233	0.0384324	hypothetical protein LOC284454	1555847_a_at	19p13.13
LOC375190	2.23476	0.0463483	hypothetical LOC375190	230435_at	2p23.3
LOC400642	2.18769	0.0137356	hypothetical gene supported by BC041875; BX648984	228160_at	18p11.31
LOC729776	2.00913	0.0140569	hypothetical protein LOC729776	229444_at	6p21.31
LOH3CR2A	2.0675	0.0249841	loss of heterozygosity, 3, chromosomal region 2, gene A	220244_at	3p25.3
MALAT1	2.36636	0.0207404	metastasis associated lung adenocarcinoma transcript 1 (non-coding RNA)	224568_x_at	11q13.1
NPAL3	2.17095	0.0477282	NIPA-like domain containing 3	225876_at	1p36.12–p35.1
SNORA28	2.01091	0.0341943	small nucleolar RNA, H/ACA box 28	241843_at	14q32.32
DKFZP686A01247	3.08599	0.0204527	hypothetical protein	212327_at	4p13
