# Supplementary material for: Genome-Wide Expression in Visceral Adipose Tissue from Obese Prepubertal Children
Source: Int J Mol Sci. 2015 Apr 8;16(4):7723–37. doi: 10.3390/ijms16047723 (PMC4425045; doi:10.3390/ijms16047723)
Supplement: Supplementary file 1 [file ijms-16-07723-s001.zip › ijms-79084-Supplementary Information/Table S2.xls]

## Sheet: Hoja1
TableS 2. Gene with down-regulated gene expression in omental adipose tissue of prepubertal obese children
Gene Symbol	Fold Change	p-value	Gene Title	Probe Set ID	Chromosomal Location
Metabolism
LYZ	-8.58744	0.0309988	lysozyme (renal amyloidosis)	1555745_a_at	12q15
UBE1L2	-4.87303	0.0460749	ubiquitin-activating enzyme E1-like 2	218340_s_at	4q13.2
PLTP	-4.01721	0.0169242	phospholipid transfer protein	202075_s_at	20q13.12
SCD	-3.43344	0.00136393	stearoyl-CoA desaturase (delta-9-desaturase)	211708_s_at	10q24.31
YWHAE	-3.14942	0.0385934	tyrosine 3-monooxygenase/tryptophan 5-monooxygenase activation protein, epsilon polypeptide	210317_s_at	17p13.3
APOE	-3.02304	0.00301449	apolipoprotein E	203381_s_at	19q13.2
DGAT2	-3.01517	0.00680667	diacylglycerol O-acyltransferase homolog 2 (mouse)	226064_s_at	11q13.5
SHMT1	-2.61651	0.0130564	serine hydroxymethyltransferase 1 (soluble)	209980_s_at	17p11.2
PAPPA	-2.55077	0.0301869	pregnancy-associated plasma protein A, pappalysin 1	224942_at	9q33.2
GFPT1	-2.48848	0.0285843	glutamine-fructose-6-phosphate transaminase 1	202721_s_at	2p13
P4HA2	-2.10131	0.0117502	procollagen-proline, 2-oxoglutarate 4-dioxygenase (proline 4-hydroxylase), alpha polypeptide II	202733_at	5q31
CALCRL	-2.63158	0.00610401	calcitonin receptor-like	210815_s_at	2q32.1
Cell Signaling
RGS4	-6.65862	0.0182794	regulator of G-protein signalling 4	204337_at	1q23.3
OSMR	-4.58485	0.0297829	oncostatin M receptor	205729_at	5p13.1
CAB39	-3.94647	0.0407083	calcium binding protein 39	224311_s_at	2q37.1
NEURL2	-3.4607	0.00958374	neuralized homolog 2 (Drosophila)	230283_at	20q13.12
SHC1	-3.43276	0.0386864	SHC (Src homology 2 domain containing) transforming protein 1	201469_s_at	1q21
PLAT	-2.7267	0.0153215	plasminogen activator, tissue	201860_s_at	8p12
MPZL1	-2	0.0366773	myelin protein zero-like 1	201875_s_at	1q24.2
Cell Adhesion, Extracellular Matrix and Cytoskeleton Proteins
LYVE1	-3.57487	0.019932	lymphatic vessel endothelial hyaluronan receptor 1	219059_s_at	11p15
CDH11	-3.36006	0.0316648	cadherin 11, type 2, OB-cadherin (osteoblast)	207172_s_at	16q22.1
LAPTM4B	-3.05474	0.0460259	lysosomal associated protein transmembrane 4 beta	1554679_a_at	8q22.1
COL5A1	-2.91273	0.0135464	collagen, type V, alpha 1	203325_s_at	9q34.2–q34.3
FLRT2	-2.68538	0.0175281	fibronectin leucine rich transmembrane protein 2	204358_s_at	14q24–q32
GOLGA8B	-2.21124	0.0295619	golgi autoantigen, golgin subfamily a, 8B	210425_x_at	15q14
Cell Proliferation, differentation and death
ZWINT	-2.85188	0.0357094	ZW10 interactor	204026_s_at	10q21–q22
sept2	-2.20247	0.0124463	septin 2	1554747_a_at	2q37
Transport
ATP6V1A	-3.2981	0.0427845	ATPase, H+ transporting, lysosomal 70kDa, V1 subunit A	201971_s_at	3q13.31
DANCR	-2.21285	0.0256011	differentiation antagonizing non-protein coding RNA	224870_at	4q12
SLC16A7	-2.03576	0.0204327	solute carrier family 16, member 7 (monocarboxylic acid transporter 2)	210807_s_at	12q13
Inmune Response
CR1	-10.1803	0.0324029	complement component (3b/4b) receptor 1 (Knops blood group)	208488_s_at	1q32
CCL18	-3.95725	0.0377532	chemokine (C-C motif) ligand 18 (pulmonary and activation-regulated)	209924_at	17q11.2
IL33	-3.34749	0.0410723	interleukin 33	209821_at	9p24.1
CFI	-3.26007	0.0299775	complement factor I	1555564_a_at	4q25
CADM3	-2.98124	0.00531203	cell adhesion molecule 3	213948_x_at	1q21.2–q22
CD200	-2.15746	0.0227905	CD200 molecule	209583_s_at	3q12–q13
Transcription Regulation
PTBP1	-2.86502	0.0470534	polypyrimidine tract binding protein 1	212016_s_at	19p13.3
BCLAF1	-2.10401	0.019387	BCL2-associated transcription factor 1	201101_s_at	6q22–q23
FUS	-2.07492	0.0458308	fusion (involved in t(12;16) in malignant liposarcoma)	1565717_s_at	16p11.2
Protein Synthesis
EIF5A	-6.28783	0.0152295	eukaryotic translation initiation factor 5A	201123_s_at	17p13–p12
RPS2	-4.10935	0.0448261	ribosomal protein S2	217466_x_at	16p13.3
CALU	-3.89266	0.0429608	calumenin	214845_s_at	7q32.1
EIF4A2	-3.00042	0.025016	eukaryotic translation initiation factor 4A, isoform 2	1555996_s_at	3q28
FKBP14	-2.74355	0.0177302	FK506 binding protein 14, 22 kDa	219390_at	7p15.1
