# Supplementary material for: Genome-Wide Expression in Visceral Adipose Tissue from Obese Prepubertal Children
Source: Int J Mol Sci. 2015 Apr 8;16(4):7723–37. doi: 10.3390/ijms16047723 (PMC4425045; doi:10.3390/ijms16047723)
Supplement: Supplementary file 1 [file ijms-16-07723-s001.zip › ijms-79084-Supplementary Information/Table S3.xls]

## Sheet: Hoja2
Table S3. Altered gene expression of genes comparing microarray versus Real-time PCR results.
Symbol	Name	Microarrays			Real-time PCR
		Fold change	p value	Probe Set ID	Fold change	* p value	Probe Set ID
CYP4B1	cytochrome P450, family 4, subfamily B, polypeptide 1	12.1237	0.002	210096_at	1.95248	0.449692	Hs00167970_m1
CES1	carboxylesterase 1 (monocyte/macrophage serine esterase 1)	11.7412	0.001	209616_s_at	3.00584	0.05	Hs00275607_m1
TNMD	tenomodulin protein	7.1934	0.028	220065_at	5.54543	0.0283655	Hs00223332_m1
IDO1	indoleamine-pyrrole 2,3 dioxygenase	5.43964	0.001	210029_at	-1.34391	0.624206	Hs00158027_m1
PPP1R14A	protein phosphatase 1, regulatory (inhibitor) subunit 14A	4.57706	0.001	227006_at	1.60144	0.150927	Hs00264434_m1
LEP	leptin (obesity homolog, mouse)	4.44325	0.005	207092_at	3.49574	0.05	Hs00174877_m1
ALDH4A1	aldehyde dehydrogenase 4 family member A1	4.38995	0.005	203722_at	1.3201	0.226476	Hs00186689_m1
NPR3	natriuretic peptide receptor C/guanylate cyclase C (atrionatriuretic peptide receptor C)	4.3125	0.005	219789_at	5.08024	0.00550173	Hs00168558_m1
DPT	dermatopontin	4.07003	0.017	213071_at	-1.27178	0.650147	Hs00170030_m1
NQO1	NAD(P)H dehydrogenase, quinone 1	3.98623	0.006	201467_s_at	2.83178	0.04125	Hs00168547_m1
FOXN3	forkhead box N3; checkpoint suppressor 1	3.81984	0.013	230790_x_at	-1.01343	0.762369	Hs00758120_m1
CCND1	cyclin D1 (PRAD1: parathyroid adenomatosis 1)	3.34365	0.05	208712_at	1.44538	0.596701	Hs00277039_m1
ANGPTL4	angiopoietin-like 4	3.19914	0.007	221009_s_at	2.39898	0.150927	Hs00211522_m1
PDK4	pyruvate dehydrogenase kinase, isoenzyme 4	3.17742	0	225207_at	1.55789	0.150927	Hs00176875_m1
BHMT2	betaine-homocysteine methyltransferase 2	3.14248	0.005	219902_at	2.30992	0.0493662	Hs00214120_m1
ADRB2	adrenergic beta-2- receptor surface	3.03994	0.003	206170_at	-1.1857	0.256839	Hs00240532_s1
CDKN2B	cyclin-dependent kinase inhibitor 2B (p15, inhibits CDK4)	2.89166	0.022	236313_at	1.4249	0.256839	Hs00793225_m1
SFRP1	secreted frizzled-related protein 1	2.86882	0.011	202037_s_at	1.40057	0.596701	Hs00610060_m1
FAM13A	family with sequence similarity 13, member A1	2.85416	0.03	202973_x_at	1.02494	0.650147	Hs00208453_m1
ATP9A	ATPase Class II type 9A	2.70034	0.045	212062_at	-1.02131	0.762369	Hs00391058_m1
VWF	von Willebrand factorGene hCG2002012 Celera Annotation	2.59129	0.023	202112_at	1.15073	0.226476	Hs00169795_m1
GNG11	guanine nucleotide binding protein (G protein) gamma 11	2.5789	0.011	204115_at	-1.2502	0.364346	Hs00914578_m1
COX7A1	cytochrome c oxidase subunit VIIa polypeptide 1 (muscle)	2.48586	0.003	204570_at	1.716	0.226476	Hs00156989_m1
CPED1	cadherin-like and PC-esterase domain containing 1	2.43	0.025	228728_at	-1.35135	0.496292	Hs00227735_m1
AKAP12	A kinase (PRKA) anchor protein (gravin) 12	2.3897	0.004	227530_at	2.40175	0.173617	Hs00178217_m1
IRS2	insulin receptor substrate 2	2.38036	0.036	209184_s_at	1.28654	0.289918	Hs00275843_s1
CLIP4	CAP-GLY domain containing linker protein family, member 4	2.33643	0.005	226425_at	-1.33471	0.198765	Hs00372786_m1
TSC22D3	TSC22 domain family, member 3	2.32166	0.006	208763_s_at	1.52093	0.0696424	Hs00608272_m1
TBX3	T-box 3 (ulnar mammary syndrome)Gene hCG40340 Celera Annotation	2.27847	0.036	225544_at	-1.01042	0.939743	Hs00255591_m1
WNK1	WNK lysine deficient protein kinase 1Gene hCG25271 Celera Annotation	2.27152	0.028	211993_at	1.03663	0.54535	Hs00219185_m1
NDRG1	N-myc downstream regulated gene 1	2.2528	0.00167573	200632_s_at	1.54172	0.256839	Hs00608389_m1
CRYAB	crystallin, alpha B	2.24988	0.00510006	209283_at	2.59828	0.0342937	Hs00157107_m1
FAM228A	family with sequence similarity 228, member A	2.23476	0.0463483	230435_at	-1.0955	0.643429	Hs00290720_m1
ALDH3A2	aldehyde dehydrogenase 3 family member A2	2.2347	0.0436247	202054_s_at	-1.1028	0.934925	Hs00166066_m1
ZFAND5	zinc finger, AN1-type domain 5	2.2286	0.00378933	210275_s_at	1.55845	0.0820987	Hs00826311_m1
FOXO3A	forkhead box O3A	2.22054	0.00503463	204131_s_at	1.19061	0.150927	Hs00818121_m1
XAF1	XIAP associated factor-1	2.21621	0.0306037	206133_at	-1.35377	0.870283	Hs00213882_m1
FBLN2	fibulin 2	2.21552	0.0102722	203886_s_at	1.58386	0.325751	Hs00157482_m1
AFF1	AF4/FMR2 family, member 1	2.20273	0.00425768	201924_at	2.93555	0.0412268	Hs00610550_m1
CITED2	Cbp/p300-interacting transactivator with Glu/Asp-rich carboxy-terminal domain 2	2.18494	0.0467149	209357_at	-1.04844	0.762369	Hs00366696_m1
GNAI1	guanine nucleotide binding protein (G protein) alpha inhibiting activity polypeptide 1	2.17051	0.0146167	209576_at	-1.34862	0.364346	Hs00157727_m1
JUND	jun D proto-oncogene	2.164	0.0273248	203752_s_at	1.06276	0.364346	Hs00534289_s1
MAML2	mastermind-like 2 (Drosophlia)	2.14868	0.0236275	235457_at	-1.06491	0.762369	Hs00418423_m1
BRAP	BRCA1 associated protein	2.14059	0.00712461	213473_at	-1.09185	0.650147	Hs00198914_m1
ANXA1	annexin A1	2.13963	0.0369306	233011_at	1.8881	0.0493662	Hs00167549_m1
MGLL	monoglyceride lipase	2.13464	0.0184982	225102_at	-1.26832	0.364346	Hs00200752_m1
ITGB5	integrin, beta 5	2.1245	0.000494809	201125_s_at	1.32298	0.0500435	Hs00609896_m1
RHOB	ARHB ras homolog gene family, member B	2.10616	0.0441554	212099_at	1.17555	0.198765	Hs00269660_s1
CD151	CD151 antigen	2.07306	0.000475535	204306_s_at	1.51072	0.198765	Hs00388381_m1
SH3D19	DKFZp434D0215 SH3 domain protein D19	2.06141	0.038686	225162_at	-1.04744	0.762369	Hs00296942_m1
HLA-E	major histocompatibility complex, class I, E	2.02367	0.0212333	200904_at	-1.78498	0.0587817	Hs00428366_m1
ADRA2A	adrenergic alpha-2A- receptor	2.0222	0.0417428	209869_at	-1.0821	1	Hs00265081_s1
NFATC1	nuclear factor of activated T-cells, cytoplasmic, calcineurin-dependent 1	2.01288	0.015611	211105_s_at	-1.19182	0.596701	Hs00542678_m1
LAMB2	laminin, beta 2 (laminin S)	2.00541	0.0232461	216264_s_at	-1.2688	0.650147	Hs00158642_m1
P4HA2	prolyl 4-hydrolase, alpha polypeptide II	-2.10131	0.012	202733_at	3.02935	0.0192834	Hs00188349_m1
GFPT1	glutamine-fructose-6-phosphate transaminase 1	-2.48848	0.0285843	202721_s_at	1.39996	0.256839	Hs00157686_m1
CALCRL	calcitonin receptor-like	-2.63666	0.00610401	210815_s_at	-2.38915	0.0342937	Hs00173787_m1
PLAT	plasminogen activator, tissue	-2.7267	0.0153215	201860_s_at	1.03015	0.650147	Hs00263492_m1
COL5A1	collagen, type V, alpha 1	-2.91273	0.0135464	203325_s_at	-1.05459	0.939743	Hs00609088_m1
DGAT	diacylglycerol O-acyltransferase homolog 2 (mouse)	-3.01517	0.00680667	226064_s_at	2.20219	0.198765	Hs00261438_m1
APOE	apolipoprotein E	-3.02304	0.00301449	203381_s_at	-1.51477	0.256839	Hs00171168_m1
CFI	complement factor I	-3.26007	0.0299775	1555564_a_at	-1.37045	0.879829	Hs00173409_m1
CDH11	cadherin 11, type 2, OB-cadherin (osteoblast)	-3.36006	0.0316648	207172_s_at	1.62388	0.0820987	Hs00156438_m1
SHC1	SHC (Src homology 2 domain containing) transforming protein 1	-3.43276	0.0386864	201469_s_at	-1.22958	0.650147	Hs00427539_m1
SCD	stearoyl-CoA desaturase (delta-9-desaturase) /// stearoyl-CoA desaturase (delta-9-desaturase)	-3.43344	0.00136393	211708_s_at	-1.30159	0.820596	Hs00748952_s1
NEURL2	neuralized-like 2 (Drosophila) SONDA: C20orf163 chromosome 20 open reading frame 163	-3.4607	0.00958375	230283_at	1.05504	0.879829	Hs00288373_m1
LYVE1	lymphatic vessel endothelial hyaluronan receptor 1	-3.57487	0.019932	219059_s_at	1.77095	0.112411	Hs00272659_m1
CALU	calumenin	-3.89266	0.0429608	214845_s_at	1.28911	0.289918	Hs00154230_m1
CCL18	chemokine (C-C motif) ligand 18 (pulmonary and activation-regulated)	-3.95725	0.0377532	209924_at	3.89321	0.0233422	Hs00268113_m1
PLTP	phospholipid transfer protein	-4.01721	0.0169242	202075_s_at	1.96153	0.289918	Hs00272126_m1
OSMR	oncostatin M receptor	-4.58485	0.0297829	205729_at	1.04052	0.939743	Hs00384278_m1
RGS4	regulator of G-protein signalling 4	-6.65862	0.0182794	204337_at	1.40157	0.596701	Hs00194501_m1
CR1	complement component (3b/4b) receptor 1, including Knops blood group system	-10.1803	0.0324029	208488_s_at	2.24793	0.0493662	Hs00559348_m1
*DCT values were compared between obese and normal-weight children by the non-parametric Wilcoxon test. Significant level P≤0.05
