# Supplementary material for: Genome-Wide Expression in Visceral Adipose Tissue from Obese Prepubertal Children
Source: Int J Mol Sci. 2015 Apr 8;16(4):7723–37. doi: 10.3390/ijms16047723 (PMC4425045; doi:10.3390/ijms16047723)
Supplement: Supplementary file 1 [file ijms-16-07723-s001.zip › ijms-79084-Supplementary Information/Table S4.xls]

## Sheet: Hoja1
Table S4. Correlation between gene expression data and clinical and biochemical parameters
Clinical and Biochemical parameters	CES1		TNMD		LEP		NPR3		NQO1		BHMT2		CRYAB		AFF1		ANXA1		ITGB5		CALCRL
	r	p	r	p	r	p	r	p	r	p	r	p	r	p	r	p	r	p	r	p	r	p
Sex	-0.019	0.937	0.095	0.692	0.189	0.424	0.227	0.349	-0.019	0.937	0.151	0.524	-0.095	0.692	0.083	0.736	-0.076	0.751	-0.077	0.761	0.341	0.142
Age	-0.015	0.949	0.014	0.954	-0.165	0.488	-0.335	0.161	0.018	0.939	-0.16	0.5	-0.072	0.764	-0.092	0.709	-0.117	0.622	-0.161	0.524	-0.088	0.711
Weight (kg)	-0.272	0.247	-0.427	0.06	-0.354	0.125	-0.608	0,01*	-0.348	0.132	-0.411	0.071	-0.283	0.227	-0.468	0,04*	-0.308	0.187	-0.339	0.169	0.139	0.588
Height (m)	-0.035	0.882	-0.128	0.591	-0.208	0.378	-0.294	0.222	-0.09	0.707	-0.271	0.248	-0.027	0.91	-0.205	0.401	-0.117	0.622	-0.1	0.692	-0.199	0.399
BMI (kg/m2)	-0.32	0.169	-0.486	0,03*	-0.317	0.173	-0.555	0,01*	-0.422	0.064	-0.367	0.111	-0.376	0.103	-0.466	0,05*	-0.296	0.205	-0.331	0.18	0.339	0.144
BMI z score	-0.361	0.118	-0.505	0,02*	-0.284	0.224	-0.479	0,04*	-0.451	0,05*	-0.329	0.157	-0.396	0.084	-0.422	0.072	-0.309	0.185	-0.312	0.208	0.39	0.089
Systolic BP (mm Hg)	-0.54	0,01*	-0.507	0,02*	-0.591	0,01*	-0.55	0,02*	-0.547	0,01*	-0.658	0,00*	-0.36	0.12	-0.196	0.421	-0.253	0.282	-0.545	0,02*	0.18	0.488
Diastolic BP (mm Hg)	-0.271	0.248	-0.311	0.182	-0.406	0.076	-0.256	0.291	-0.188	0.427	-0.3	0.199	-0.156	0.512	-0.227	0.351	-0.044	0.855	-0.087	0.732	0.137	0.565
Glucose (mmol/L)	-0.312	0.181	-0.251	0.285	-0.218	0.355	-0.057	0.816	-0.219	0.353	-0.212	0.371	-0.078	0.745	-0.015	0.952	-0.308	0.187	-0.232	0.355	0.216	0.36
Insulin (pmol/L)	0.038	0.888	-0.044	0.871	-0.171	0.528	-0.311	0.26	0.003	0.991	-0.118	0.664	0.088	0.745	-0.171	0.528	-0.053	0.846	0.321	0.243	-0.103	0.704
HOMA-IR	-0.049	0.858	-0.277	0.3	-0.281	0.292	-0.329	0.231	-0.147	0.587	-0.25	0.35	0.043	0.875	-0.275	0.302	-0.116	0.668	0.288	0.298	-0.06	0.824
TAG (mmol/L)	0.228	0.362	0.055	0.828	-0.179	0.478	-0.1	0.704	0.115	0.649	-0.213	0.397	-0.075	0.768	0.007	0.978	-0.367	0.134	0.179	0.506	-0.094	0.709
TC (mmol/L)	0.071	0.778	-0.019	0.942	-0.04	0.874	-0.092	0.725	0.064	0.8	0.074	0.769	0.106	0.677	-0.373	0.14	0.102	0.686	0.306	0.25	-0.101	0.689
HDL-C (mmol/L)	0.249	0.319	-0.094	0.711	0.049	0.848	0.204	0.433	0.014	0.955	0.249	0.319	0.21	0.404	-0.265	0.304	0.593	0,01*	0.323	0.223	-0.265	0.287
LDL-C (mmol/L)	0.066	0.794	0.064	0.801	-0.065	0.798	-0.161	0.538	0.068	0.788	0.05	0.845	-0.029	0.909	-0.321	0.208	-0.007	0.977	0.199	0.461	-0.011	0.964
Apo A1 (g/L)	0.126	0.616	-0.11	0.663	0.06	0.813	0.078	0.765	-0.072	0.776	0.06	0.813	0.191	0.448	-0.222	0.392	0.276	0.268	0.233	0.386	-0.085	0.738
Apo B (g/L)	-0.122	0.63	0.022	0.932	-0.095	0.708	-0.044	0.866	0.039	0.877	-0.035	0.89	0.015	0.951	-0.228	0.379	-0.069	0.785	0.218	0.418	-0.01	0.968
Adiponectin (mg/L)	0.075	0.759	-0.054	0.825	0.174	0.477	0.119	0.639	-0.074	0.764	0.154	0.528	0.218	0.371	0.032	0.9	0.184	0.45	-0.049	0.852	0.135	0.581
Leptin (μg/L)	-0.439	0.06	-0.289	0.229	-0.435	0.063	-0.536	0,02*	-0.326	0.173	-0.325	0.175	-0.416	0.077	-0.377	0.123	-0.554	0,01*	-0.294	0.252	0.47	0,04*
CRP (g/L)	0.097	0.684	0.183	0.44	0.032	0.895	-0.09	0.713	0.139	0.558	0.033	0.89	-0.049	0.838	-0.145	0.554	-0.259	0.27	0.103	0.683	0.145	0.543
Spearmann correlation was performed between gene expression data, using deltaCt values, and clinical and biochemical parameters (n = 20), *p ≤ 0.05
